# Supplementary material
Source: PubMed Central journal article supplement (PMC7050622)
Supplement: NIHMS1055187-supplement-sup.pdf [file NIHMS1055187-supplement-sup.pdf]

## Supplementary Information

2'-Deoxy-2'-fluoro-arabinonucleic acid: A valid alternative to  
DNA for biotechnological applications using charge transport

Ruijie D. Teo,<sup>a</sup> Elizabeth R. Smithwick,<sup>a,b</sup> and Agostino Migliore<sup>\*a</sup>

<sup>a</sup> Department of Chemistry, Duke University, Durham, North Carolina 27708, United States.

<sup>b</sup> Department of Chemistry, University of Minnesota, Minneapolis, Minnesota 55455, United States.

\*Email: [agostino.migliore@duke.edu](mailto:agostino.migliore@duke.edu).

**Table S1.** Electronic coupling values (in meV) obtained using the method in ref 1 for the indicated nucleobase pairs in the DNA and 2'F-ANA snapshots at the times  $t_i$  of their MD simulations. The electronic coupling values at intermediate times, starting from 10 ns, were calculated in ref 2.

| $t_i$ (ns) | DNA   |                     |                                   |                     | 2'F-ANA |                     |                                   |                      |
|------------|-------|---------------------|-----------------------------------|---------------------|---------|---------------------|-----------------------------------|----------------------|
|            | CG-GC | GC-A <sub>1</sub> T | A <sub>1</sub> T-A <sub>2</sub> T | A <sub>2</sub> T-TA | CG-GC   | GC-A <sub>1</sub> T | A <sub>1</sub> T-A <sub>2</sub> T | A <sub>2</sub> T-TA  |
| 10.5       | 6.6   | 205.1               | 52.8                              | 16.7                | 1.6     | 45.5                | 2.3                               | 4.6                  |
| 11.5       | 16.0  | 99.2                | 71.0                              | 1.6                 | 5.1     | 3.8                 | 44.3                              | 1.2                  |
| 12.5       | 68.4  | 68.3                | 4.9                               | 64.2                | 48.4    | 49.8                | 22.1                              | 4.5                  |
| 13.5       | 12.3  | 6.2                 | 10.4                              | 23.1                | 15.4    | 46.4                | 9.5                               | 25.8                 |
| 14.5       | 0.4   | 34.2                | - <sup>a</sup>                    | 76.4                | 36.6    | 21.1                | 24.8                              | 11.3                 |
| 15.5       | 3.2   | 136.1               | 66.0                              | 4.0                 | 1.1     | 4.9                 | 7.2                               | 9.6                  |
| 16.5       | 2.2   | 65.6                | 15.9                              | 4.7                 | 0.4     | 41.6                | 44.4                              | 12.5                 |
| 17.5       | 11.4  | 262.5               | 110.5                             | 14.5                | 6.0     | 46.9                | 13.6                              | 6.8                  |
| 18.5       | 6.8   | 161.2               | 109.3                             | 10.7                | 36.6    | 21.1                | 24.8                              | 11.3                 |
| 19.5       | 6.2   | 110.7               | 18.8                              | 138.7               | 0.6     | 53.6                | 14.3                              | 5.0                  |
| 20.5       | 5.8   | 92.1                | 43.1                              | 33.4                | 18.6    | 52.6                | 47.7                              | 121.1                |
| 21.5       | 3.9   | 68.5                | 58.0                              | 37.1                | 9.5     | 33.2                | 12.5                              | 0.3                  |
| 22.5       | 0.1   | 120.8               | 53.4                              | 23.9                | 10.4    | 39.1                | 12.8                              | $3.8 \times 10^{-2}$ |
| 23.5       | 4.4   | 14.6                | 17.2                              | 10.7                | 12.7    | 13.6                | 32.9                              | 14.6                 |
| 24.5       | 7.2   | 8.9                 | 109.2                             | 40.1                | 4.8     | 48.7                | 30.4                              | 6.3                  |
| 25.5       | 1.2   | 5.0                 | 60.6                              | 27.6                | 10.2    | 40.3                | 6.7                               | 95.6                 |
| 26.5       | 7.9   | 16.9                | 32.0                              | 23.1                | 3.4     | 83.0                | 77.8                              | 0.3                  |
| 27.5       | 26.1  | 52.6                | 37.1                              | 54.8                | 18.9    | 44.7                | 5.4                               | $1.3 \times 10^{-2}$ |
| 28.5       | 6.6   | 22.1                | 58.0                              | 17.0                | 1.2     | 12.5                | 22.9                              | 2.8                  |
| 29.5       | 9.8   | 54.0                | 37.3                              | 11.7                | 0.5     | 37.4                | 52.0                              | 1.5                  |
| 30.5       | 5.0   | 37.1                | 3.0                               | 4.4                 | 15.4    | 25.3                | 4.6                               | 3.2                  |
| 31.5       | 14.0  | 118.0               | 49.6                              | 35.7                | 1.6     | 42.5                | 32.0                              | 7.5                  |
| 32.5       | 7.6   | 76.1                | 63.4                              | 14.7                | 3.3     | 7.0                 | 5.2                               | 5.7                  |
| 33.5       | 1.8   | 57.0                | 39.9                              | 3.2                 | 6.6     | 28.0                | 2.6                               | 83.2                 |
| 34.5       | 6.2   | 10.9                | 17.5                              | 4.5                 | 3.0     | 15.9                | 24.4                              | 167.1                |
| 35.5       | 21.9  | 65.4                | 13.7                              | 309.4               | 3.3     | 66.0                | 2.4                               | 27.2                 |
| 36.5       | 4.9   | 184.4               | 83.4                              | 22.5                | 60.2    | 0.5                 | 37.4                              | 105.7                |
| 37.5       | 4.1   | 233.0               | 20.1                              | 12.2                | 2.5     | 73.2                | 0.2                               | 1.1                  |
| 38.5       | 0.7   | 126.7               | 14.9                              | 2.6                 | 15.3    | 71.8                | 80.8                              | 2.4                  |
| 39.5       | 19.4  | 67.9                | 29.7                              | 12.0                | 18.0    | 26.3                | 8.6                               | 15.8                 |
| 40.5       | 0.3   | 109.3               | 269.3                             | 7.4                 | 5.2     | 0.5                 | 56.9                              | 12.8                 |
| 41.5       | 18.9  | 4.2                 | 68.2                              | 13.5                | 0.3     | 53.5                | 36.3                              | 33.4                 |
| 42.5       | 11.2  | 34.4                | 103.2                             | 146.6               | 12.9    | 21.1                | 33.9                              | 9.0                  |
| 43.5       | 9.5   | 191.7               | 47.7                              | 18.1                | 4.7     | 45.9                | 8.6                               | 0.2                  |
| 44.5       | 33.7  | 31.0                | 12.2                              | 7.1                 | 1.8     | 33.9                | 54.0                              | 17.8                 |
| 45.5       | 37.1  | 12.6                | 19.3                              | 2.8                 | 22.0    | 24.9                | 20.6                              | 15.3                 |
| 46.5       | 28.5  | 11.3                | 30.6                              | 0.6                 | 0.8     | 18.5                | 63.9                              | 5.6                  |
| 47.5       | 15.2  | 67.1                | 205.0                             | 9.7                 | 4.1     | 53.0                | 0.2                               | 13.5                 |
| 48.5       | 9.3   | 12.8                | 12.1                              | 4.0                 | 4.6     | 9.2                 | 51.3                              | 149.9                |
| 49.5       | 0.5   | 94.4                | 3.9                               | 39.3                | 35.0    | 31.2                | 17.3                              | 4.6                  |

<sup>a</sup> DFT convergence was not obtained for this electronic coupling calculation.

**Table S2.** Norm of the ground-state vector expansion on the diabatic electronic states required to calculate the electronic couplings using the method of ref 1. The norm proximity to unity measures the quality of the two-state approximation.<sup>1</sup>

| $t_i$ (ns) | DNA   |                     |                                   |                     | 2'F-ANA |                     |                                   |                     |
|------------|-------|---------------------|-----------------------------------|---------------------|---------|---------------------|-----------------------------------|---------------------|
|            | CG-GC | GC-A <sub>1</sub> T | A <sub>1</sub> T-A <sub>2</sub> T | A <sub>2</sub> T-TA | CG-GC   | GC-A <sub>1</sub> T | A <sub>1</sub> T-A <sub>2</sub> T | A <sub>2</sub> T-TA |
| 10.5       | 0.999 | 0.998               | 0.996                             | 0.992               | 0.998   | 0.999               | 0.998                             | 0.998               |
| 11.5       | 0.997 | 0.999               | 0.995                             | 0.986               | 0.999   | 1.000               | 0.997                             | 0.999               |
| 12.5       | 0.992 | 0.999               | 0.998                             | 0.994               | 0.997   | 0.999               | 0.998                             | 0.994               |
| 13.5       | 0.998 | 0.999               | 0.999                             | 0.984               | 0.998   | 1.000               | 0.998                             | 0.990               |
| 14.5       | 0.998 | 0.999               | -                                 | 0.994               | 0.996   | 1.000               | 0.995                             | 0.968               |
| 15.5       | 0.997 | 0.998               | 0.996                             | 0.968               | 0.998   | 1.000               | 0.998                             | 0.996               |
| 16.5       | 0.998 | 1.000               | 0.998                             | 0.996               | 0.998   | 0.999               | 0.992                             | 0.999               |
| 17.5       | 0.998 | 0.997               | 0.995                             | 0.990               | 1.000   | 1.000               | 0.997                             | 0.964               |
| 18.5       | 0.998 | 0.999               | 0.993                             | 0.998               | 0.996   | 1.000               | 0.995                             | 0.968               |
| 19.5       | 0.999 | 0.999               | 0.995                             | 0.988               | 0.998   | 1.000               | 1.000                             | 0.986               |
| 20.5       | 0.998 | 0.999               | 0.996                             | 0.996               | 0.999   | 0.998               | 0.993                             | 0.976               |
| 21.5       | 0.997 | 0.999               | 0.996                             | 0.990               | 0.999   | 0.998               | 0.994                             | 0.968               |
| 22.5       | 0.998 | 1.000               | 0.997                             | 0.991               | 1.000   | 0.998               | 0.997                             | 0.967               |
| 23.5       | 0.997 | 0.999               | 0.993                             | 0.998               | 0.998   | 1.000               | 0.995                             | 0.999               |
| 24.5       | 0.997 | 0.999               | 0.998                             | 0.991               | 0.998   | 1.000               | 0.995                             | 0.983               |
| 25.5       | 0.998 | 1.000               | 0.995                             | 0.998               | 0.998   | 1.000               | 0.998                             | 0.988               |
| 26.5       | 0.997 | 1.000               | 0.993                             | 0.997               | 0.998   | 0.998               | 0.997                             | 0.996               |
| 27.5       | 0.998 | 0.998               | 0.997                             | 0.993               | 0.998   | 0.999               | 0.995                             | 0.999               |
| 28.5       | 1.000 | 0.999               | 0.998                             | 0.995               | 0.999   | 0.999               | 0.996                             | 0.996               |
| 29.5       | 0.998 | 0.999               | 0.996                             | 0.997               | 1.000   | 0.998               | 0.993                             | 0.986               |
| 30.5       | 0.999 | 1.000               | 0.994                             | 0.999               | 0.997   | 0.998               | 0.991                             | 0.989               |
| 31.5       | 0.998 | 0.999               | 0.997                             | 0.980               | 0.998   | 0.998               | 0.998                             | 0.982               |
| 32.5       | 0.998 | 1.000               | 0.996                             | 0.969               | 0.998   | 0.999               | 0.995                             | 0.998               |
| 33.5       | 0.999 | 0.999               | 0.999                             | 0.996               | 0.998   | 0.999               | 0.997                             | 0.993               |
| 34.5       | 0.998 | 1.000               | 0.998                             | 0.984               | 0.999   | 0.999               | 0.996                             | 0.993               |
| 35.5       | 0.997 | 0.999               | 0.995                             | 0.991               | 0.999   | 0.995               | 0.997                             | 0.977               |
| 36.5       | 0.998 | 0.999               | 0.994                             | 0.997               | 0.987   | 0.999               | 0.996                             | 0.994               |
| 37.5       | 0.998 | 0.998               | 0.998                             | 0.999               | 0.999   | 0.999               | 0.999                             | 0.998               |
| 38.5       | 0.999 | 0.999               | 0.998                             | 0.985               | 0.998   | 0.998               | 0.993                             | 0.975               |
| 39.5       | 0.997 | 1.000               | 0.999                             | 0.992               | 0.997   | 0.999               | 0.999                             | 0.997               |
| 40.5       | 0.999 | 0.999               | 0.990                             | 0.999               | 0.999   | 1.000               | 0.995                             | 0.998               |
| 41.5       | 0.998 | 0.999               | 0.997                             | 0.991               | 0.998   | 0.999               | 0.999                             | 0.991               |
| 42.5       | 0.999 | 0.998               | 0.997                             | 0.992               | 0.998   | 0.999               | 1.000                             | 0.998               |
| 43.5       | 0.997 | 0.998               | 0.996                             | 0.985               | 0.998   | 0.998               | 0.997                             | 0.988               |
| 44.5       | 0.998 | 1.000               | 0.998                             | 0.995               | 0.998   | 0.999               | 0.997                             | 0.998               |
| 45.5       | 0.998 | 0.999               | 0.999                             | 0.994               | 0.999   | 0.999               | 0.999                             | 0.989               |
| 46.5       | 0.997 | 1.000               | 0.995                             | 0.994               | 0.998   | 1.000               | 0.994                             | 0.989               |
| 47.5       | 0.997 | 0.998               | 0.994                             | 0.989               | 0.998   | 1.000               | 0.998                             | 0.990               |
| 48.5       | 0.999 | 0.999               | 0.999                             | 0.998               | 0.999   | 0.999               | 0.997                             | 0.989               |
| 49.5       | 0.997 | 1.000               | 0.981                             | 0.992               | 0.997   | 0.999               | 0.997                             | 0.987               |

**Table S3.** Atomic coordinates and Löwdin charges (in units of electron elementary charge) of the G nucleobase in the DNA CG base pair used to calculate the effective radius  $R_G$  and the center of charge position vector  $\mathbf{r}_c$  at 10 ns. The partial atomic charges were obtained from DFT calculations at the M11/6-311g\*\* level of computational accuracy.

| atom | $x$     | $y$     | $z$     | $q$     |
|------|---------|---------|---------|---------|
| N    | 39.3200 | 35.0240 | 21.4930 | -0.0357 |
| C    | 38.7180 | 35.6110 | 22.5750 | 0.2098  |
| N    | 37.7610 | 34.9520 | 23.1000 | -0.0263 |
| C    | 37.5160 | 33.9330 | 22.1530 | 0.3549  |
| C    | 36.4360 | 32.9690 | 22.0140 | -0.0597 |
| O    | 35.4850 | 32.7430 | 22.7560 | 0.1896  |
| N    | 36.3710 | 32.3920 | 20.7380 | -0.0111 |
| C    | 37.3920 | 32.4800 | 19.8560 | 0.0239  |
| N    | 37.2560 | 31.6820 | 18.8370 | 0.0760  |
| N    | 38.4950 | 33.1960 | 20.0150 | 0.2131  |
| C    | 38.4170 | 34.0500 | 21.0840 | 0.0639  |
| H    | 40.0343 | 35.4373 | 20.9031 | -0.0012 |
| H    | 39.0150 | 36.4590 | 23.1020 | 0.0012  |
| H    | 35.7400 | 31.6330 | 20.4850 | -0.0009 |
| H    | 36.5470 | 31.0000 | 18.6380 | 0.0020  |
| H    | 38.0310 | 31.6200 | 18.1540 | 0.0007  |

**Table S4.** Atomic coordinates and Löwdin charges of the G nucleobase in the DNA GC base pair at 10 ns.

| atom | <i>x</i> | <i>y</i> | <i>z</i> | <i>q</i> |
|------|----------|----------|----------|----------|
| N    | 37.5250  | 28.0100  | 20.0440  | -0.0182  |
| C    | 36.4860  | 27.2560  | 20.3600  | 0.2085   |
| N    | 36.0120  | 27.4700  | 21.5720  | 0.0195   |
| C    | 36.8230  | 28.4990  | 22.0860  | 0.2598   |
| C    | 36.8390  | 29.1880  | 23.3760  | -0.0451  |
| O    | 36.1850  | 29.0180  | 24.4080  | 0.1454   |
| N    | 37.7310  | 30.2560  | 23.3270  | -0.0087  |
| C    | 38.7340  | 30.3430  | 22.4760  | 0.0276   |
| N    | 39.6470  | 31.2240  | 22.7850  | 0.0887   |
| N    | 38.7570  | 29.7030  | 21.3070  | 0.2519   |
| C    | 37.7650  | 28.7830  | 21.1600  | 0.0710   |
| H    | 38.0712  | 28.0172  | 19.1902  | -0.0008  |
| H    | 36.0210  | 26.5540  | 19.6560  | -0.0013  |
| H    | 37.7380  | 30.7960  | 24.2030  | -0.0009  |
| H    | 39.5250  | 31.8530  | 23.5700  | 0.0020   |
| H    | 40.4560  | 31.2920  | 22.1210  | 0.0006   |

**Table S5.** Atomic coordinates and Löwdin charges of the A nucleobase in the DNA A<sub>1</sub>T base pair at 10 ns.

| atom | <i>x</i> | <i>y</i> | <i>z</i> | <i>q</i> |
|------|----------|----------|----------|----------|
| N    | 42.4550  | 28.2340  | 21.4650  | 0.0016   |
| C    | 41.5780  | 27.2090  | 21.2230  | 0.1025   |
| N    | 40.7620  | 26.9100  | 22.2190  | 0.0298   |
| C    | 40.9910  | 27.9980  | 23.1010  | 0.1832   |
| C    | 40.5150  | 28.4090  | 24.4000  | 0.0122   |
| N    | 39.7150  | 27.7780  | 25.1820  | 0.2817   |
| N    | 41.1280  | 29.3920  | 25.0450  | 0.1130   |
| C    | 42.0900  | 30.0500  | 24.5190  | -0.0238  |
| N    | 42.6600  | 29.9020  | 23.3030  | 0.3467   |
| C    | 42.0260  | 28.7940  | 22.6220  | -0.0551  |
| H    | 43.1457  | 28.6203  | 20.8317  | -0.0006  |
| H    | 41.5750  | 26.5140  | 20.4380  | 0.0004   |
| H    | 39.4140  | 28.2200  | 26.0380  | 0.0042   |
| H    | 39.5370  | 26.7850  | 25.0510  | 0.0048   |
| H    | 42.4510  | 30.7210  | 25.1350  | -0.0006  |

**Table S6.** Atomic coordinates and Löwdin charges of the A nucleobase in the DNA A<sub>2</sub>T base pair at 10 ns.

| atom | <i>x</i> | <i>y</i> | <i>z</i> | <i>q</i> |
|------|----------|----------|----------|----------|
| N    | 44.7160  | 28.0420  | 24.9380  | -0.0118  |
| C    | 44.4820  | 26.8260  | 24.2690  | 0.1415   |
| N    | 43.6830  | 26.0180  | 24.9340  | 0.0146   |
| C    | 43.2780  | 26.8220  | 26.0320  | 0.2254   |
| C    | 42.3120  | 26.6730  | 27.0690  | 0.0141   |
| N    | 41.4500  | 25.6730  | 27.1120  | 0.3124   |
| N    | 42.1410  | 27.6020  | 28.0050  | 0.0804   |
| C    | 42.9440  | 28.6760  | 27.9910  | 0.0018   |
| N    | 43.8870  | 28.8940  | 27.1090  | 0.2197   |
| C    | 43.9720  | 27.9990  | 26.1000  | -0.0070  |
| H    | 45.3474  | 28.7822  | 24.6546  | -0.0007  |
| H    | 44.9560  | 26.6160  | 23.3070  | -0.0007  |
| H    | 40.7470  | 25.6440  | 27.8300  | 0.0051   |
| H    | 41.5010  | 24.8910  | 26.4760  | 0.0053   |
| H    | 42.8280  | 29.3380  | 28.8470  | -0.0001  |

**Table S7.** Atomic coordinates and Löwdin charges of the A nucleobase in the DNA TA base pair at 10 ns.

| atom | $x$     | $y$     | $z$     | $q$     |
|------|---------|---------|---------|---------|
| N    | 40.4440 | 24.2390 | 33.8170 | -0.0055 |
| C    | 39.9780 | 23.2770 | 32.9750 | 0.1234  |
| N    | 40.4460 | 23.2790 | 31.7570 | 0.0318  |
| C    | 41.4430 | 24.2620 | 31.8300 | 0.2104  |
| C    | 42.3950 | 24.7100 | 30.9290 | 0.0177  |
| N    | 42.3460 | 24.2520 | 29.7460 | 0.2558  |
| N    | 43.2710 | 25.5910 | 31.2770 | 0.0634  |
| C    | 43.1060 | 26.2230 | 32.3900 | 0.0236  |
| N    | 42.2350 | 25.9520 | 33.3870 | 0.2897  |
| C    | 41.4680 | 24.8070 | 33.0700 | -0.0179 |
| H    | 40.2333 | 24.3898 | 34.7955 | -0.0006 |
| H    | 39.1840 | 22.5660 | 33.2130 | -0.0005 |
| H    | 43.0600 | 24.6670 | 29.1360 | 0.0032  |
| H    | 41.6970 | 23.5670 | 29.4910 | 0.0058  |
| H    | 43.7730 | 27.0200 | 32.5650 | -0.0002 |



**Table S8.** Atomic coordinates and Löwdin charges of the G nucleobase in the 2'F-ANA CG base pair at 10 ns.

| atom | $x$     | $y$     | $z$     | $q$     |
|------|---------|---------|---------|---------|
| H    | 18.0411 | 15.8493 | 14.6907 | -0.0011 |
| N    | 18.7960 | 16.4900 | 14.4750 | -0.0311 |
| C    | 20.0700 | 16.5210 | 15.0200 | 0.2243  |
| H    | 20.4340 | 15.7600 | 15.6760 | -0.0005 |
| N    | 20.7980 | 17.5420 | 14.6100 | -0.0060 |
| C    | 19.9000 | 18.2720 | 13.8110 | 0.2926  |
| C    | 20.0390 | 19.4800 | 13.0150 | -0.0524 |
| O    | 21.0010 | 20.2120 | 12.7730 | 0.1772  |
| N    | 18.9510 | 19.8980 | 12.4520 | -0.0139 |
| H    | 19.0070 | 20.7800 | 11.9750 | -0.0012 |
| C    | 17.7220 | 19.2400 | 12.4950 | 0.0226  |
| N    | 16.7640 | 19.6900 | 11.7420 | 0.0866  |
| H    | 16.9240 | 20.4910 | 11.1410 | 0.0018  |
| H    | 15.9040 | 19.1400 | 11.6360 | 0.0011  |
| N    | 17.5450 | 18.0690 | 13.1130 | 0.2261  |
| C    | 18.6820 | 17.6840 | 13.7530 | 0.0737  |

**Table S9.** Atomic coordinates and Löwdin charges of the G nucleobase in the 2'F-ANA GC base pair at 10 ns.

| atom | <i>x</i> | <i>y</i> | <i>z</i> | <i>q</i> |
|------|----------|----------|----------|----------|
| N    | 14.7560  | 24.1400  | 12.3850  | -0.0361  |
| C    | 15.4770  | 25.1440  | 11.8490  | 0.2287   |
| N    | 16.7210  | 25.2280  | 12.1940  | -0.0309  |
| C    | 16.8380  | 24.0480  | 12.9550  | 0.3620   |
| C    | 17.9200  | 23.5500  | 13.7390  | -0.0481  |
| O    | 19.0700  | 23.9080  | 13.8090  | 0.1698   |
| N    | 17.5570  | 22.4210  | 14.4550  | -0.0151  |
| C    | 16.3150  | 21.8010  | 14.4140  | 0.0224   |
| N    | 16.1360  | 20.8540  | 15.2580  | 0.0824   |
| N    | 15.2250  | 22.3080  | 13.8300  | 0.1993   |
| C    | 15.5860  | 23.4130  | 13.1150  | 0.0675   |
| H    | 13.7732  | 23.9489  | 12.2250  | -0.0013  |
| H    | 15.0650  | 25.9140  | 11.1250  | -0.0024  |
| H    | 18.2390  | 22.0770  | 15.1280  | -0.0010  |
| H    | 16.8750  | 20.4220  | 15.8300  | 0.0017   |
| H    | 15.2460  | 20.3480  | 15.1960  | 0.0010   |

**Table S10.** Atomic coordinates and Löwdin charges of the A nucleobase in the 2'F-ANA A<sub>1</sub>T base pair at 10 ns.

| atom | <i>x</i> | <i>y</i> | <i>z</i> | <i>q</i> |
|------|----------|----------|----------|----------|
| N    | 13.9720  | 24.1590  | 16.6750  | -0.0008  |
| C    | 14.0150  | 25.2750  | 15.8510  | 0.1605   |
| N    | 15.2590  | 25.8040  | 15.8180  | 0.0477   |
| C    | 16.0780  | 24.8980  | 16.5370  | 0.1971   |
| C    | 17.4730  | 24.7270  | 16.8400  | 0.0172   |
| N    | 18.4400  | 25.5680  | 16.5010  | 0.2790   |
| N    | 17.8770  | 23.6260  | 17.4670  | 0.0527   |
| C    | 16.9640  | 22.6760  | 17.9290  | 0.0304   |
| N    | 15.6290  | 22.8180  | 17.7840  | 0.1938   |
| C    | 15.2790  | 23.9080  | 17.0640  | 0.0177   |
| H    | 13.1834  | 23.5518  | 16.8669  | -0.0005  |
| H    | 13.1640  | 25.7440  | 15.3260  | -0.0009  |
| H    | 19.3860  | 25.3110  | 16.7750  | 0.0040   |
| H    | 18.1830  | 26.4020  | 15.9070  | 0.0026   |
| H    | 17.2390  | 21.7510  | 18.4590  | -0.0003  |

**Table S11.** Atomic coordinates and Löwdin charges of the A nucleobase in the 2'F-ANA A<sub>2</sub>T base pair at 10 ns.

| atom | <i>x</i> | <i>y</i> | <i>z</i> | <i>q</i> |
|------|----------|----------|----------|----------|
| N    | 14.9630  | 24.3300  | 20.8030  | 0.0071   |
| C    | 14.1360  | 25.2140  | 20.1760  | 0.1038   |
| N    | 14.7720  | 26.1350  | 19.5290  | 0.0380   |
| C    | 16.1340  | 25.8770  | 19.8030  | 0.1774   |
| C    | 17.3370  | 26.6090  | 19.5740  | 0.0022   |
| N    | 17.5090  | 27.7250  | 18.8600  | 0.3203   |
| N    | 18.4880  | 26.1400  | 20.0800  | 0.1106   |
| C    | 18.4290  | 25.0370  | 20.7560  | -0.0163  |
| N    | 17.4200  | 24.3100  | 21.0860  | 0.2778   |
| C    | 16.2470  | 24.7690  | 20.5440  | -0.0272  |
| H    | 14.7137  | 23.5241  | 21.3636  | -0.0004  |
| H    | 13.1120  | 25.0850  | 20.1280  | 0.0002   |
| H    | 18.4700  | 28.1260  | 18.8840  | 0.0031   |
| H    | 16.7280  | 28.0950  | 18.2740  | 0.0035   |
| H    | 19.3370  | 24.7270  | 21.1130  | -0.0001  |

**Table S12.** Atomic coordinates and Löwdin charges of the A nucleobase in the 2'F-ANA TA base pair at 10 ns.

| atom | <i>x</i> | <i>y</i> | <i>z</i> | <i>q</i> |
|------|----------|----------|----------|----------|
| N    | 23.3100  | 31.6740  | 20.8790  | 0.0000   |
| C    | 22.6580  | 32.3480  | 19.7740  | 0.1050   |
| N    | 21.4150  | 32.0850  | 19.6670  | 0.0237   |
| C    | 21.1760  | 31.1050  | 20.6510  | 0.2016   |
| C    | 20.0560  | 30.3490  | 20.9690  | 0.0071   |
| N    | 18.8570  | 30.4580  | 20.3410  | 0.3544   |
| N    | 20.0310  | 29.6150  | 22.0990  | 0.1004   |
| C    | 21.1760  | 29.5420  | 22.8230  | -0.0169  |
| N    | 22.3510  | 30.0370  | 22.4740  | 0.2436   |
| C    | 22.2560  | 30.8710  | 21.4200  | -0.0309  |
| H    | 24.2699  | 31.7283  | 21.1924  | -0.0005  |
| H    | 23.1950  | 33.1460  | 19.2330  | -0.0010  |
| H    | 18.0780  | 29.9500  | 20.6550  | 0.0070   |
| H    | 18.8220  | 30.9630  | 19.4870  | 0.0065   |
| H    | 21.2050  | 28.7850  | 23.5870  | 0.0000   |

**Table S13.** Center-to-center distance  $R_{D-A}$  (in Å) for the indicated charge-donor ( $D$ ) and acceptor ( $A$ ) DNA nucleobase pairs in the selected MD snapshots at the indicated simulation times  $t_i$ .  $R_{D-A}$  is obtained as the distance between the  $D$  and  $A$  centers of charge (see Methods section).

| $t_i$ (ns) | CG-GC | GC-A <sub>1</sub> T | A <sub>1</sub> T-A <sub>2</sub> T | A <sub>2</sub> T-TA |
|------------|-------|---------------------|-----------------------------------|---------------------|
| 10.0       | 4.84  | 4.18                | 3.61                              | 5.78                |
| 10.5       | 6.16  | 3.54                | 3.31                              | 6.01                |
| 11.0       | 5.36  | 4.01                | 3.50                              | 5.88                |
| 11.5       | 6.22  | 4.28                | 3.33                              | 6.16                |
| 12.0       | 6.62  | 3.71                | 3.60                              | 5.60                |
| 12.5       | 5.98  | 3.55                | 3.75                              | 5.77                |
| 13.0       | 5.90  | 3.38                | 3.57                              | 5.86                |
| 13.5       | 5.14  | 4.11                | 3.77                              | 6.46                |
| 14.0       | 6.67  | 3.86                | 3.81                              | 5.96                |
| 14.5       | 6.62  | 4.00                | 3.80                              | 5.87                |
| 15.0       | 6.10  | 3.75                | 3.56                              | 5.32                |
| 15.5       | 5.78  | 3.89                | 3.55                              | 6.55                |
| 16.0       | 5.35  | 3.60                | 3.76                              | 6.33                |
| 16.5       | 5.48  | 3.62                | 3.76                              | 5.86                |
| 17.0       | 6.12  | 3.37                | 3.93                              | 6.58                |
| 17.5       | 5.22  | 3.56                | 3.78                              | 5.99                |
| 18.0       | 5.64  | 3.47                | 3.66                              | 5.61                |
| 18.5       | 6.35  | 3.78                | 3.43                              | 6.43                |
| 19.0       | 6.03  | 3.79                | 3.82                              | 6.55                |
| 19.5       | 5.64  | 3.59                | 3.43                              | 6.52                |
| 20.0       | 6.47  | 3.98                | 3.42                              | 6.04                |
| 20.5       | 5.88  | 3.92                | 3.49                              | 5.78                |
| 21.0       | 6.18  | 3.91                | 3.68                              | 5.92                |
| 21.5       | 5.62  | 3.79                | 3.57                              | 5.89                |
| 22.0       | 6.14  | 4.04                | 3.49                              | 6.07                |
| 22.5       | 6.16  | 3.70                | 3.54                              | 6.16                |
| 23.0       | 5.90  | 3.48                | 3.94                              | 5.52                |
| 23.5       | 5.05  | 3.55                | 3.60                              | 6.06                |
| 24.0       | 5.57  | 3.88                | 3.84                              | 6.20                |
| 24.5       | 5.67  | 3.49                | 3.62                              | 6.58                |
| 25.0       | 5.22  | 3.82                | 3.76                              | 6.31                |
| 25.5       | 5.49  | 3.73                | 3.52                              | 6.12                |
| 26.0       | 5.88  | 3.91                | 3.66                              | 6.65                |
| 26.5       | 5.50  | 3.86                | 3.61                              | 6.13                |
| 27.0       | 6.21  | 3.74                | 3.70                              | 6.19                |
| 27.5       | 6.27  | 3.65                | 3.87                              | 6.03                |
| 28.0       | 5.60  | 3.73                | 3.40                              | 6.28                |
| 28.5       | 5.38  | 3.95                | 3.63                              | 5.91                |

|      |      |      |      |      |
|------|------|------|------|------|
| 29.0 | 6.04 | 3.75 | 3.76 | 6.40 |
| 29.5 | 5.69 | 4.35 | 3.72 | 6.11 |
| 30.0 | 6.04 | 4.00 | 3.81 | 5.95 |
| 30.5 | 6.07 | 3.79 | 3.52 | 6.51 |
| 31.0 | 5.11 | 4.23 | 3.93 | 6.16 |
| 31.5 | 6.09 | 3.83 | 3.51 | 5.63 |
| 32.0 | 5.97 | 4.13 | 3.60 | 5.95 |
| 32.5 | 6.07 | 3.80 | 3.45 | 6.47 |
| 33.0 | 5.66 | 3.91 | 3.90 | 6.32 |
| 33.5 | 6.64 | 3.54 | 3.95 | 6.22 |
| 34.0 | 4.61 | 3.59 | 3.55 | 6.13 |
| 34.5 | 5.63 | 3.62 | 3.89 | 6.32 |
| 35.0 | 6.56 | 4.07 | 3.94 | 5.90 |
| 35.5 | 5.42 | 3.95 | 3.61 | 6.10 |
| 36.0 | 5.77 | 4.12 | 3.69 | 6.21 |
| 36.5 | 5.53 | 3.60 | 3.43 | 5.82 |
| 37.0 | 5.78 | 4.05 | 4.06 | 5.53 |
| 37.5 | 6.11 | 3.65 | 3.64 | 6.23 |
| 38.0 | 6.28 | 4.05 | 3.48 | 5.86 |
| 38.5 | 6.50 | 3.62 | 3.73 | 5.83 |
| 39.0 | 5.64 | 3.77 | 4.26 | 6.22 |
| 39.5 | 6.15 | 3.69 | 3.88 | 5.81 |
| 40.0 | 5.75 | 3.74 | 4.08 | 6.04 |
| 40.5 | 5.79 | 4.15 | 3.53 | 6.14 |
| 41.0 | 5.72 | 3.45 | 3.64 | 6.14 |
| 41.5 | 6.31 | 3.68 | 3.67 | 5.71 |
| 42.0 | 5.70 | 3.66 | 3.88 | 5.75 |
| 42.5 | 5.79 | 3.58 | 3.83 | 6.08 |
| 43.0 | 6.08 | 3.91 | 3.33 | 6.28 |
| 43.5 | 5.69 | 3.72 | 3.69 | 6.42 |
| 44.0 | 6.21 | 3.73 | 3.69 | 6.90 |
| 44.5 | 6.50 | 3.49 | 3.64 | 6.07 |
| 45.0 | 5.37 | 3.70 | 3.84 | 6.50 |
| 45.5 | 6.00 | 3.87 | 3.80 | 6.21 |
| 46.0 | 5.16 | 3.82 | 4.27 | 6.33 |
| 46.5 | 5.37 | 3.97 | 4.01 | 6.82 |
| 47.0 | 5.28 | 3.63 | 3.90 | 6.47 |
| 47.5 | 5.46 | 4.11 | 3.68 | 6.35 |
| 48.0 | 5.10 | 4.09 | 3.62 | 6.36 |
| 48.5 | 6.04 | 3.57 | 4.08 | 6.29 |
| 49.0 | 5.48 | 3.76 | 3.60 | 6.18 |
| 49.5 | 5.49 | 4.01 | 3.62 | 6.65 |
| 50.0 | 6.00 | 3.83 | 4.12 | 6.40 |

**Table S14.** Center-to-center distance  $R_{D-A}$  (in Å) for the indicated 2'F-ANA nucleobase pairs in the selected MD snapshots at the indicated simulation times  $t_i$ .

| $t_i$ (ns) | CG-GC | GC-A <sub>1</sub> T | A <sub>1</sub> T-A <sub>2</sub> T | A <sub>2</sub> T-TA |
|------------|-------|---------------------|-----------------------------------|---------------------|
| 10.0       | 6.00  | 3.64                | 3.48                              | 5.99                |
| 10.5       | 4.44  | 3.97                | 4.18                              | 6.77                |
| 11.0       | 5.12  | 3.68                | 3.47                              | 6.24                |
| 11.5       | 4.97  | 4.33                | 3.86                              | 7.24                |
| 12.0       | 5.31  | 4.04                | 3.32                              | 6.79                |
| 12.5       | 5.47  | 4.05                | 3.86                              | 6.82                |
| 13.0       | 5.49  | 4.42                | 3.70                              | 5.67                |
| 13.5       | 4.32  | 4.12                | 4.11                              | 6.18                |
| 14.0       | 3.88  | 4.34                | 3.90                              | 6.22                |
| 14.5       | 4.51  | 3.90                | 3.51                              | 6.13                |
| 15.0       | 5.30  | 3.68                | 3.73                              | 6.45                |
| 15.5       | 5.03  | 4.52                | 4.03                              | 6.36                |
| 16.0       | 5.12  | 4.02                | 3.92                              | 6.63                |
| 16.5       | 5.30  | 4.35                | 3.99                              | 6.22                |
| 17.0       | 5.06  | 3.56                | 4.01                              | 7.59                |
| 17.5       | 5.08  | 3.90                | 3.66                              | 5.83                |
| 18.0       | 4.36  | 3.96                | 3.74                              | 5.94                |
| 18.5       | 4.51  | 3.90                | 3.51                              | 6.13                |
| 19.0       | 4.79  | 3.73                | 4.03                              | 6.73                |
| 19.5       | 4.89  | 3.90                | 3.92                              | 6.81                |
| 20.0       | 5.63  | 3.80                | 3.70                              | 6.65                |
| 20.5       | 4.43  | 4.06                | 3.86                              | 6.96                |
| 21.0       | 4.95  | 4.53                | 4.72                              | 7.26                |
| 21.5       | 5.37  | 3.97                | 4.12                              | 7.70                |
| 22.0       | 5.03  | 3.88                | 3.64                              | 6.98                |
| 22.5       | 4.92  | 4.24                | 3.91                              | 7.24                |
| 23.0       | 4.78  | 3.85                | 3.75                              | 6.11                |
| 23.5       | 5.40  | 3.84                | 3.50                              | 6.13                |
| 24.0       | 4.80  | 3.68                | 3.66                              | 6.06                |
| 24.5       | 5.25  | 4.11                | 3.89                              | 6.77                |
| 25.0       | 4.98  | 4.11                | 3.83                              | 6.14                |
| 25.5       | 4.62  | 4.31                | 3.67                              | 6.92                |
| 26.0       | 5.46  | 3.69                | 3.70                              | 6.26                |
| 26.5       | 4.88  | 4.07                | 3.90                              | 7.22                |
| 27.0       | 5.24  | 4.19                | 3.97                              | 7.76                |
| 27.5       | 5.02  | 3.98                | 3.61                              | 7.89                |
| 28.0       | 5.36  | 3.43                | 4.09                              | 6.28                |
| 28.5       | 4.86  | 3.86                | 3.88                              | 5.62                |
| 29.0       | 5.11  | 4.03                | 3.69                              | 7.67                |
| 29.5       | 5.01  | 3.86                | 3.97                              | 6.67                |



|      |      |      |      |      |
|------|------|------|------|------|
| 30.0 | 5.40 | 3.94 | 3.64 | 6.79 |
| 30.5 | 5.36 | 4.01 | 3.83 | 6.75 |
| 31.0 | 4.41 | 4.14 | 3.71 | 6.47 |
| 31.5 | 4.63 | 3.62 | 3.62 | 6.21 |
| 32.0 | 4.84 | 3.88 | 3.77 | 6.51 |
| 32.5 | 5.05 | 3.53 | 3.60 | 7.04 |
| 33.0 | 4.99 | 4.21 | 3.58 | 6.31 |
| 33.5 | 5.08 | 3.90 | 4.04 | 6.93 |
| 34.0 | 5.52 | 3.74 | 3.58 | 6.63 |
| 34.5 | 5.74 | 3.66 | 3.67 | 6.05 |
| 35.0 | 5.53 | 4.04 | 3.63 | 5.97 |
| 35.5 | 5.42 | 4.21 | 4.24 | 6.34 |
| 36.0 | 4.18 | 4.15 | 3.85 | 7.07 |
| 36.5 | 5.31 | 3.77 | 3.77 | 6.94 |
| 37.0 | 4.92 | 3.84 | 3.96 | 6.31 |
| 37.5 | 4.95 | 3.47 | 3.98 | 7.20 |
| 38.0 | 4.99 | 3.77 | 3.74 | 6.47 |
| 38.5 | 5.47 | 4.05 | 3.78 | 7.87 |
| 39.0 | 5.55 | 4.17 | 3.94 | 7.84 |
| 39.5 | 5.53 | 3.91 | 3.95 | 6.66 |
| 40.0 | 5.02 | 4.01 | 3.91 | 6.65 |
| 40.5 | 4.73 | 3.81 | 3.52 | 6.34 |
| 41.0 | 5.25 | 3.85 | 3.69 | 6.79 |
| 41.5 | 5.18 | 4.27 | 3.60 | 6.34 |
| 42.0 | 4.80 | 4.24 | 4.40 | 6.05 |
| 42.5 | 5.46 | 3.82 | 3.80 | 6.54 |
| 43.0 | 5.36 | 4.05 | 3.56 | 6.78 |
| 43.5 | 5.32 | 3.80 | 3.80 | 7.59 |
| 44.0 | 5.48 | 3.88 | 4.07 | 7.49 |
| 44.5 | 4.81 | 3.98 | 3.64 | 6.34 |
| 45.0 | 5.91 | 3.44 | 4.05 | 7.06 |
| 45.5 | 4.86 | 3.57 | 3.78 | 6.27 |
| 46.0 | 5.64 | 3.63 | 3.67 | 6.61 |
| 46.5 | 5.24 | 3.96 | 3.43 | 6.92 |
| 47.0 | 5.40 | 3.68 | 3.41 | 6.44 |
| 47.5 | 4.53 | 4.03 | 4.19 | 6.30 |
| 48.0 | 5.00 | 3.94 | 3.90 | 6.73 |
| 48.5 | 5.62 | 3.83 | 3.41 | 6.55 |
| 49.0 | 4.43 | 3.88 | 3.76 | 7.72 |
| 49.5 | 5.15 | 4.26 | 3.83 | 6.76 |
| 50.0 | 5.30 | 4.08 | 3.57 | 6.89 |

**Table S15.** Purine nucleobase effective radius,  $R_{\text{purine}}$  (base pair), for the different DNA base pairs at the indicated MD simulation times  $t_i$ . These radii (in Å) are used in eq 4b.

| $t_i$ (ns) | $R_G$ (CG) | $R_G$ (GC) | $R_A$ (A <sub>1</sub> T) | $R_A$ (A <sub>2</sub> T) | $R_A$ (TA) |
|------------|------------|------------|--------------------------|--------------------------|------------|
| 10.0       | 2.45       | 2.43       | 2.32                     | 2.33                     | 2.26       |
| 10.5       | 2.42       | 2.43       | 2.33                     | 2.35                     | 2.29       |
| 11.0       | 2.41       | 2.43       | 2.28                     | 2.31                     | 2.29       |
| 11.5       | 2.43       | 2.44       | 2.31                     | 2.33                     | 2.29       |
| 12.0       | 2.42       | 2.43       | 2.33                     | 2.33                     | 2.30       |
| 12.5       | 2.45       | 2.43       | 2.30                     | 2.30                     | 2.33       |
| 13.0       | 2.42       | 2.43       | 2.28                     | 2.30                     | 2.30       |
| 13.5       | 2.45       | 2.45       | 2.32                     | 2.32                     | 2.29       |
| 14.0       | 2.44       | 2.46       | 2.34                     | 2.31                     | 2.33       |
| 14.5       | 2.48       | 2.44       | 2.33                     | 2.33                     | 2.30       |
| 15.0       | 2.42       | 2.43       | 2.29                     | 2.34                     | 2.34       |
| 15.5       | 2.45       | 2.42       | 2.32                     | 2.29                     | 2.29       |
| 16.0       | 2.43       | 2.45       | 2.31                     | 2.31                     | 2.28       |
| 16.5       | 2.42       | 2.41       | 2.30                     | 2.31                     | 2.30       |
| 17.0       | 2.42       | 2.44       | 2.31                     | 2.27                     | 2.32       |
| 17.5       | 2.42       | 2.44       | 2.33                     | 2.30                     | 2.30       |
| 18.0       | 2.43       | 2.42       | 2.33                     | 2.39                     | 2.36       |
| 18.5       | 2.43       | 2.43       | 2.27                     | 2.27                     | 2.27       |
| 19.0       | 2.42       | 2.43       | 2.29                     | 2.30                     | 2.33       |
| 19.5       | 2.45       | 2.43       | 2.35                     | 2.30                     | 2.33       |
| 20.0       | 2.42       | 2.42       | 2.31                     | 2.29                     | 2.32       |
| 20.5       | 2.41       | 2.44       | 2.30                     | 2.32                     | 2.31       |
| 21.0       | 2.40       | 2.46       | 2.32                     | 2.34                     | 2.28       |
| 21.5       | 2.45       | 2.43       | 2.32                     | 2.33                     | 2.29       |
| 22.0       | 2.46       | 2.43       | 2.29                     | 2.33                     | 2.30       |
| 22.5       | 2.46       | 2.44       | 2.30                     | 2.31                     | 2.30       |
| 23.0       | 2.41       | 2.44       | 2.33                     | 2.32                     | 2.30       |
| 23.5       | 2.43       | 2.44       | 2.30                     | 2.32                     | 2.29       |
| 24.0       | 2.45       | 2.46       | 2.33                     | 2.41                     | 2.32       |
| 24.5       | 2.45       | 2.42       | 2.30                     | 2.31                     | 2.32       |
| 25.0       | 2.45       | 2.44       | 2.31                     | 2.31                     | 2.33       |
| 25.5       | 2.46       | 2.45       | 2.31                     | 2.29                     | 2.32       |
| 26.0       | 2.46       | 2.46       | 2.33                     | 2.28                     | 2.30       |
| 26.5       | 2.45       | 2.46       | 2.37                     | 2.32                     | 2.31       |
| 27.0       | 2.40       | 2.43       | 2.33                     | 2.31                     | 2.29       |
| 27.5       | 2.46       | 2.42       | 2.31                     | 2.30                     | 2.35       |
| 28.0       | 2.47       | 2.44       | 2.29                     | 2.31                     | 2.31       |
| 28.5       | 2.44       | 2.48       | 2.28                     | 2.34                     | 2.32       |
| 29.0       | 2.43       | 2.44       | 2.33                     | 2.28                     | 2.30       |
| 29.5       | 2.44       | 2.40       | 2.31                     | 2.32                     | 2.30       |

|      |      |      |      |      |      |
|------|------|------|------|------|------|
| 30.0 | 2.43 | 2.42 | 2.32 | 2.36 | 2.32 |
| 30.5 | 2.43 | 2.39 | 2.28 | 2.31 | 2.30 |
| 31.0 | 2.42 | 2.44 | 2.28 | 2.30 | 2.31 |
| 31.5 | 2.44 | 2.44 | 2.31 | 2.28 | 2.32 |
| 32.0 | 2.44 | 2.43 | 2.30 | 2.34 | 2.34 |
| 32.5 | 2.44 | 2.41 | 2.34 | 2.29 | 2.34 |
| 33.0 | 2.41 | 2.42 | 2.30 | 2.32 | 2.28 |
| 33.5 | 2.43 | 2.42 | 2.32 | 2.30 | 2.29 |
| 34.0 | 2.44 | 2.41 | 2.32 | 2.30 | 2.32 |
| 34.5 | 2.44 | 2.43 | 2.37 | 2.29 | 2.28 |
| 35.0 | 2.46 | 2.44 | 2.31 | 2.33 | 2.31 |
| 35.5 | 2.45 | 2.41 | 2.34 | 2.33 | 2.28 |
| 36.0 | 2.45 | 2.45 | 2.30 | 2.29 | 2.30 |
| 36.5 | 2.43 | 2.43 | 2.33 | 2.31 | 2.32 |
| 37.0 | 2.43 | 2.43 | 2.30 | 2.35 | 2.31 |
| 37.5 | 2.43 | 2.40 | 2.33 | 2.32 | 2.26 |
| 38.0 | 2.43 | 2.46 | 2.30 | 2.32 | 2.31 |
| 38.5 | 2.44 | 2.43 | 2.38 | 2.35 | 2.31 |
| 39.0 | 2.46 | 2.43 | 2.29 | 2.32 | 2.33 |
| 39.5 | 2.47 | 2.41 | 2.27 | 2.32 | 2.32 |
| 40.0 | 2.42 | 2.43 | 2.28 | 2.30 | 2.28 |
| 40.5 | 2.43 | 2.44 | 2.29 | 2.30 | 2.30 |
| 41.0 | 2.43 | 2.46 | 2.31 | 2.35 | 2.31 |
| 41.5 | 2.42 | 2.44 | 2.30 | 2.32 | 2.38 |
| 42.0 | 2.41 | 2.46 | 2.28 | 2.38 | 2.35 |
| 42.5 | 2.45 | 2.44 | 2.27 | 2.31 | 2.33 |
| 43.0 | 2.43 | 2.47 | 2.29 | 2.31 | 2.30 |
| 43.5 | 2.41 | 2.43 | 2.34 | 2.28 | 2.31 |
| 44.0 | 2.41 | 2.41 | 2.33 | 2.30 | 2.29 |
| 44.5 | 2.46 | 2.42 | 2.31 | 2.32 | 2.30 |
| 45.0 | 2.45 | 2.43 | 2.32 | 2.31 | 2.27 |
| 45.5 | 2.44 | 2.42 | 2.29 | 2.31 | 2.33 |
| 46.0 | 2.45 | 2.41 | 2.31 | 2.28 | 2.29 |
| 46.5 | 2.43 | 2.43 | 2.31 | 2.28 | 2.32 |
| 47.0 | 2.43 | 2.45 | 2.29 | 2.32 | 2.30 |
| 47.5 | 2.45 | 2.42 | 2.31 | 2.32 | 2.36 |
| 48.0 | 2.40 | 2.44 | 2.30 | 2.31 | 2.29 |
| 48.5 | 2.44 | 2.40 | 2.31 | 2.28 | 2.35 |
| 49.0 | 2.44 | 2.45 | 2.29 | 2.31 | 2.34 |
| 49.5 | 2.41 | 2.42 | 2.31 | 2.29 | 2.32 |
| 50.0 | 2.44 | 2.42 | 2.31 | 2.31 | 2.29 |

**Table S16.** Effective radius ( $\text{\AA}$ ) of the purine nucleobase in each 2'F-ANA base pair indicated, at the MD simulation time  $t_i$ .

| $t_i$ (ns) | $R_G$ (CG) | $R_G$ (GC) | $R_A$ (A <sub>1</sub> T) | $R_A$ (A <sub>2</sub> T) | $R_A$ (TA) |
|------------|------------|------------|--------------------------|--------------------------|------------|
| 10.0       | 2.43       | 2.43       | 2.33                     | 2.32                     | 2.35       |
| 10.5       | 2.44       | 2.43       | 2.27                     | 2.28                     | 2.31       |
| 11.0       | 2.43       | 2.44       | 2.32                     | 2.31                     | 2.32       |
| 11.5       | 2.43       | 2.50       | 2.28                     | 2.27                     | 2.35       |
| 12.0       | 2.45       | 2.43       | 2.31                     | 2.29                     | 2.29       |
| 12.5       | 2.43       | 2.41       | 2.31                     | 2.30                     | 2.33       |
| 13.0       | 2.44       | 2.46       | 2.31                     | 2.33                     | 2.32       |
| 13.5       | 2.43       | 2.45       | 2.29                     | 2.33                     | 2.32       |
| 14.0       | 2.44       | 2.45       | 2.32                     | 2.34                     | 2.32       |
| 14.5       | 2.43       | 2.42       | 2.31                     | 2.30                     | 2.37       |
| 15.0       | 2.41       | 2.46       | 2.30                     | 2.30                     | 2.31       |
| 15.5       | 2.44       | 2.42       | 2.33                     | 2.31                     | 2.29       |
| 16.0       | 2.45       | 2.46       | 2.34                     | 2.27                     | 2.30       |
| 16.5       | 2.42       | 2.43       | 2.35                     | 2.29                     | 2.31       |
| 17.0       | 2.42       | 2.44       | 2.48                     | 2.31                     | 2.29       |
| 17.5       | 2.41       | 2.42       | 2.29                     | 2.30                     | 2.32       |
| 18.0       | 2.43       | 2.42       | 2.28                     | 2.30                     | 2.26       |
| 18.5       | 2.43       | 2.42       | 2.31                     | 2.30                     | 2.37       |
| 19.0       | 2.43       | 2.43       | 2.30                     | 2.31                     | 2.29       |
| 19.5       | 2.44       | 2.44       | 2.29                     | 2.29                     | 2.26       |
| 20.0       | 2.44       | 2.46       | 2.33                     | 2.30                     | 2.29       |
| 20.5       | 2.45       | 2.43       | 2.33                     | 2.30                     | 2.30       |
| 21.0       | 2.45       | 2.43       | 2.30                     | 2.30                     | 2.34       |
| 21.5       | 2.40       | 2.44       | 2.31                     | 2.31                     | 2.30       |
| 22.0       | 2.44       | 2.41       | 2.33                     | 2.30                     | 2.32       |
| 22.5       | 2.42       | 2.43       | 2.29                     | 2.31                     | 2.33       |
| 23.0       | 2.42       | 2.42       | 2.34                     | 2.32                     | 2.27       |
| 23.5       | 2.42       | 2.43       | 2.34                     | 2.31                     | 2.32       |
| 24.0       | 2.42       | 2.44       | 2.32                     | 2.32                     | 2.31       |
| 24.5       | 2.42       | 2.45       | 2.34                     | 2.32                     | 2.33       |
| 25.0       | 2.41       | 2.43       | 2.29                     | 2.29                     | 2.32       |
| 25.5       | 2.44       | 2.43       | 2.30                     | 2.31                     | 2.30       |
| 26.0       | 2.45       | 2.45       | 2.29                     | 2.27                     | 2.32       |
| 26.5       | 2.46       | 2.42       | 2.32                     | 2.29                     | 2.33       |
| 27.0       | 2.45       | 2.43       | 2.34                     | 2.32                     | 2.30       |
| 27.5       | 2.42       | 2.43       | 2.32                     | 2.31                     | 2.32       |
| 28.0       | 2.43       | 2.42       | 2.29                     | 2.31                     | 2.32       |
| 28.5       | 2.42       | 2.43       | 2.31                     | 2.32                     | 2.34       |
| 29.0       | 2.41       | 2.43       | 2.33                     | 2.31                     | 2.31       |
| 29.5       | 2.42       | 2.45       | 2.33                     | 2.32                     | 2.31       |

|      |      |      |      |      |      |
|------|------|------|------|------|------|
| 30.0 | 2.42 | 2.48 | 2.28 | 2.33 | 2.34 |
| 30.5 | 2.44 | 2.43 | 2.31 | 2.30 | 2.31 |
| 31.0 | 2.42 | 2.44 | 2.32 | 2.29 | 2.29 |
| 31.5 | 2.42 | 2.44 | 2.30 | 2.33 | 2.31 |
| 32.0 | 2.42 | 2.43 | 2.30 | 2.32 | 2.31 |
| 32.5 | 2.45 | 2.44 | 2.30 | 2.29 | 2.32 |
| 33.0 | 2.45 | 2.44 | 2.34 | 2.26 | 2.33 |
| 33.5 | 2.42 | 2.41 | 2.29 | 2.32 | 2.39 |
| 34.0 | 2.43 | 2.42 | 2.31 | 2.33 | 2.29 |
| 34.5 | 2.43 | 2.43 | 2.33 | 2.36 | 2.28 |
| 35.0 | 2.44 | 2.40 | 2.33 | 2.29 | 2.33 |
| 35.5 | 2.43 | 2.44 | 2.32 | 2.26 | 2.31 |
| 36.0 | 2.43 | 2.43 | 2.30 | 2.29 | 2.34 |
| 36.5 | 2.43 | 2.43 | 2.32 | 2.31 | 2.31 |
| 37.0 | 2.41 | 2.42 | 2.30 | 2.32 | 2.32 |
| 37.5 | 2.42 | 2.45 | 2.26 | 2.32 | 2.31 |
| 38.0 | 2.42 | 2.41 | 2.29 | 2.31 | 2.31 |
| 38.5 | 2.46 | 2.42 | 2.34 | 2.30 | 2.31 |
| 39.0 | 2.45 | 2.44 | 2.31 | 2.30 | 2.29 |
| 39.5 | 2.45 | 2.43 | 2.31 | 2.32 | 2.32 |
| 40.0 | 2.42 | 2.44 | 2.29 | 2.33 | 2.32 |
| 40.5 | 2.45 | 2.44 | 2.32 | 2.29 | 2.32 |
| 41.0 | 2.45 | 2.43 | 2.26 | 2.27 | 2.32 |
| 41.5 | 2.45 | 2.43 | 2.31 | 2.31 | 2.31 |
| 42.0 | 2.40 | 2.44 | 2.35 | 2.31 | 2.35 |
| 42.5 | 2.43 | 2.41 | 2.31 | 2.28 | 2.32 |
| 43.0 | 2.46 | 2.42 | 2.29 | 2.33 | 2.32 |
| 43.5 | 2.42 | 2.44 | 2.31 | 2.31 | 2.29 |
| 44.0 | 2.48 | 2.43 | 2.28 | 2.32 | 2.31 |
| 44.5 | 2.46 | 2.37 | 2.31 | 2.29 | 2.26 |
| 45.0 | 2.43 | 2.46 | 2.31 | 2.34 | 2.31 |
| 45.5 | 2.44 | 2.40 | 2.32 | 2.30 | 2.31 |
| 46.0 | 2.43 | 2.43 | 2.32 | 2.28 | 2.29 |
| 46.5 | 2.41 | 2.45 | 2.31 | 2.33 | 2.33 |
| 47.0 | 2.44 | 2.44 | 2.30 | 2.36 | 2.35 |
| 47.5 | 2.42 | 2.43 | 2.30 | 2.31 | 2.31 |
| 48.0 | 2.44 | 2.46 | 2.30 | 2.33 | 2.32 |
| 48.5 | 2.46 | 2.46 | 2.31 | 2.32 | 2.30 |
| 49.0 | 2.44 | 2.44 | 2.29 | 2.32 | 2.32 |
| 49.5 | 2.39 | 2.41 | 2.29 | 2.33 | 2.29 |
| 50.0 | 2.46 | 2.43 | 2.36 | 2.30 | 2.32 |

**Table S17.**  $\lambda_{D-A}^i + \lambda_{D-A}^o(t_i)$  (see eq 4a), in eV, for the indicated DNA base pairs, using the dielectric constant set  $\mathcal{S}_1 = \{\epsilon_o = 2.27, \epsilon_s = 12.4\}$ .

| $t_i$ (ns) | CG-GC | GC-A <sub>1</sub> T | A <sub>1</sub> T-A <sub>2</sub> T | A <sub>2</sub> T-TA |
|------------|-------|---------------------|-----------------------------------|---------------------|
| 10.0       | 1.67  | 1.46                | 1.21                              | 1.78                |
| 10.5       | 1.91  | 1.23                | 1.06                              | 1.79                |
| 11.0       | 1.79  | 1.43                | 1.19                              | 1.78                |
| 11.5       | 1.91  | 1.49                | 1.10                              | 1.82                |
| 12.0       | 1.98  | 1.30                | 1.20                              | 1.73                |
| 12.5       | 1.88  | 1.25                | 1.28                              | 1.76                |
| 13.0       | 1.88  | 1.18                | 1.23                              | 1.78                |
| 13.5       | 1.73  | 1.43                | 1.27                              | 1.86                |
| 14.0       | 1.95  | 1.33                | 1.29                              | 1.78                |
| 14.5       | 1.94  | 1.39                | 1.27                              | 1.77                |
| 15.0       | 1.91  | 1.33                | 1.19                              | 1.65                |
| 15.5       | 1.85  | 1.37                | 1.20                              | 1.89                |
| 16.0       | 1.77  | 1.25                | 1.28                              | 1.85                |
| 16.5       | 1.82  | 1.29                | 1.29                              | 1.78                |
| 17.0       | 1.90  | 1.16                | 1.36                              | 1.89                |
| 17.5       | 1.76  | 1.24                | 1.28                              | 1.80                |
| 18.0       | 1.84  | 1.20                | 1.19                              | 1.67                |
| 18.5       | 1.94  | 1.35                | 1.19                              | 1.89                |
| 19.0       | 1.89  | 1.35                | 1.32                              | 1.86                |
| 19.5       | 1.83  | 1.25                | 1.13                              | 1.86                |
| 20.0       | 1.96  | 1.40                | 1.15                              | 1.80                |
| 20.5       | 1.87  | 1.38                | 1.17                              | 1.75                |
| 21.0       | 1.91  | 1.36                | 1.23                              | 1.78                |
| 21.5       | 1.82  | 1.33                | 1.19                              | 1.78                |
| 22.0       | 1.90  | 1.43                | 1.18                              | 1.80                |
| 22.5       | 1.89  | 1.30                | 1.20                              | 1.82                |
| 23.0       | 1.87  | 1.20                | 1.33                              | 1.72                |
| 23.5       | 1.72  | 1.24                | 1.22                              | 1.81                |
| 24.0       | 1.80  | 1.35                | 1.25                              | 1.77                |
| 24.5       | 1.83  | 1.23                | 1.23                              | 1.86                |
| 25.0       | 1.74  | 1.34                | 1.28                              | 1.83                |
| 25.5       | 1.79  | 1.31                | 1.19                              | 1.81                |
| 26.0       | 1.84  | 1.36                | 1.25                              | 1.90                |
| 26.5       | 1.79  | 1.32                | 1.19                              | 1.81                |
| 27.0       | 1.93  | 1.31                | 1.25                              | 1.83                |
| 27.5       | 1.92  | 1.29                | 1.32                              | 1.78                |
| 28.0       | 1.81  | 1.32                | 1.14                              | 1.83                |
| 28.5       | 1.76  | 1.39                | 1.23                              | 1.76                |
| 29.0       | 1.89  | 1.31                | 1.28                              | 1.87                |
| 29.5       | 1.85  | 1.53                | 1.26                              | 1.81                |

|      |      |      |      |      |
|------|------|------|------|------|
| 30.0 | 1.90 | 1.41 | 1.27 | 1.76 |
| 30.5 | 1.92 | 1.37 | 1.20 | 1.86 |
| 31.0 | 1.74 | 1.49 | 1.36 | 1.82 |
| 31.5 | 1.89 | 1.35 | 1.20 | 1.75 |
| 32.0 | 1.88 | 1.45 | 1.21 | 1.76 |
| 32.5 | 1.90 | 1.33 | 1.15 | 1.85 |
| 33.0 | 1.85 | 1.39 | 1.33 | 1.85 |
| 33.5 | 1.97 | 1.24 | 1.35 | 1.84 |
| 34.0 | 1.63 | 1.26 | 1.20 | 1.81 |
| 34.5 | 1.82 | 1.25 | 1.31 | 1.86 |
| 35.0 | 1.94 | 1.43 | 1.33 | 1.77 |
| 35.5 | 1.79 | 1.38 | 1.20 | 1.81 |
| 36.0 | 1.84 | 1.44 | 1.27 | 1.84 |
| 36.5 | 1.81 | 1.25 | 1.13 | 1.76 |
| 37.0 | 1.86 | 1.43 | 1.37 | 1.70 |
| 37.5 | 1.91 | 1.29 | 1.22 | 1.85 |
| 38.0 | 1.91 | 1.42 | 1.17 | 1.77 |
| 38.5 | 1.95 | 1.24 | 1.22 | 1.75 |
| 39.0 | 1.82 | 1.34 | 1.45 | 1.81 |
| 39.5 | 1.90 | 1.33 | 1.34 | 1.76 |
| 40.0 | 1.86 | 1.33 | 1.41 | 1.82 |
| 40.5 | 1.85 | 1.46 | 1.20 | 1.82 |
| 41.0 | 1.83 | 1.19 | 1.21 | 1.79 |
| 41.5 | 1.93 | 1.30 | 1.25 | 1.71 |
| 42.0 | 1.84 | 1.29 | 1.30 | 1.71 |
| 42.5 | 1.84 | 1.27 | 1.32 | 1.80 |
| 43.0 | 1.88 | 1.37 | 1.11 | 1.84 |
| 43.5 | 1.85 | 1.29 | 1.25 | 1.86 |
| 44.0 | 1.93 | 1.31 | 1.24 | 1.92 |
| 44.5 | 1.95 | 1.22 | 1.23 | 1.81 |
| 45.0 | 1.77 | 1.30 | 1.31 | 1.88 |
| 45.5 | 1.89 | 1.37 | 1.30 | 1.81 |
| 46.0 | 1.75 | 1.36 | 1.46 | 1.86 |
| 46.5 | 1.79 | 1.40 | 1.38 | 1.91 |
| 47.0 | 1.76 | 1.28 | 1.33 | 1.85 |
| 47.5 | 1.80 | 1.45 | 1.24 | 1.81 |
| 48.0 | 1.75 | 1.44 | 1.23 | 1.85 |
| 48.5 | 1.90 | 1.27 | 1.40 | 1.83 |
| 49.0 | 1.79 | 1.33 | 1.22 | 1.80 |
| 49.5 | 1.82 | 1.42 | 1.23 | 1.88 |
| 50.0 | 1.88 | 1.36 | 1.40 | 1.86 |

**Table S18.**  $\lambda_{D-A}^i + \lambda_{D-A}^o(t_i)$ , in eV, for the 2'F-ANA base pairs, using  $S_1 = \{\varepsilon_o = 2.27, \varepsilon_s = 12.4\}$ .

| $t_i$ (ns) | CG-GC | GC-A <sub>1</sub> T | A <sub>1</sub> T-A <sub>2</sub> T | A <sub>2</sub> T-TA |
|------------|-------|---------------------|-----------------------------------|---------------------|
| 10.0       | 1.89  | 1.27                | 1.15                              | 1.77                |
| 10.5       | 1.58  | 1.42                | 1.45                              | 1.90                |
| 11.0       | 1.73  | 1.29                | 1.16                              | 1.82                |
| 11.5       | 1.68  | 1.49                | 1.35                              | 1.94                |
| 12.0       | 1.77  | 1.42                | 1.10                              | 1.91                |
| 12.5       | 1.82  | 1.43                | 1.32                              | 1.90                |
| 13.0       | 1.79  | 1.52                | 1.25                              | 1.73                |
| 13.5       | 1.54  | 1.45                | 1.40                              | 1.81                |
| 14.0       | 1.40  | 1.50                | 1.31                              | 1.81                |
| 14.5       | 1.60  | 1.38                | 1.19                              | 1.79                |
| 15.0       | 1.77  | 1.28                | 1.28                              | 1.86                |
| 15.5       | 1.72  | 1.55                | 1.37                              | 1.85                |
| 16.0       | 1.72  | 1.39                | 1.34                              | 1.90                |
| 16.5       | 1.78  | 1.49                | 1.35                              | 1.83                |
| 17.0       | 1.73  | 1.17                | 1.29                              | 1.98                |
| 17.5       | 1.74  | 1.39                | 1.26                              | 1.76                |
| 18.0       | 1.56  | 1.41                | 1.29                              | 1.82                |
| 18.5       | 1.60  | 1.38                | 1.19                              | 1.79                |
| 19.0       | 1.67  | 1.32                | 1.38                              | 1.90                |
| 19.5       | 1.68  | 1.38                | 1.36                              | 1.93                |
| 20.0       | 1.81  | 1.32                | 1.25                              | 1.89                |
| 20.5       | 1.57  | 1.42                | 1.31                              | 1.92                |
| 21.0       | 1.70  | 1.57                | 1.57                              | 1.94                |
| 21.5       | 1.79  | 1.39                | 1.40                              | 1.99                |
| 22.0       | 1.72  | 1.37                | 1.22                              | 1.91                |
| 22.5       | 1.70  | 1.49                | 1.34                              | 1.93                |
| 23.0       | 1.68  | 1.35                | 1.26                              | 1.83                |
| 23.5       | 1.79  | 1.34                | 1.16                              | 1.80                |
| 24.0       | 1.67  | 1.29                | 1.24                              | 1.80                |
| 24.5       | 1.76  | 1.42                | 1.31                              | 1.88                |
| 25.0       | 1.72  | 1.45                | 1.32                              | 1.82                |
| 25.5       | 1.63  | 1.51                | 1.25                              | 1.91                |
| 26.0       | 1.78  | 1.30                | 1.28                              | 1.84                |
| 26.5       | 1.68  | 1.43                | 1.33                              | 1.94                |
| 27.0       | 1.75  | 1.45                | 1.33                              | 1.99                |
| 27.5       | 1.72  | 1.40                | 1.22                              | 2.00                |
| 28.0       | 1.79  | 1.21                | 1.40                              | 1.83                |
| 28.5       | 1.69  | 1.37                | 1.32                              | 1.72                |
| 29.0       | 1.74  | 1.41                | 1.24                              | 1.98                |
| 29.5       | 1.71  | 1.34                | 1.34                              | 1.88                |



|      |      |      |      |      |
|------|------|------|------|------|
| 30.0 | 1.77 | 1.38 | 1.24 | 1.87 |
| 30.5 | 1.78 | 1.41 | 1.31 | 1.90 |
| 31.0 | 1.57 | 1.44 | 1.27 | 1.87 |
| 31.5 | 1.63 | 1.27 | 1.22 | 1.81 |
| 32.0 | 1.69 | 1.37 | 1.28 | 1.86 |
| 32.5 | 1.72 | 1.24 | 1.23 | 1.93 |
| 33.0 | 1.70 | 1.45 | 1.22 | 1.85 |
| 33.5 | 1.74 | 1.39 | 1.38 | 1.87 |
| 34.0 | 1.82 | 1.32 | 1.20 | 1.87 |
| 34.5 | 1.85 | 1.28 | 1.21 | 1.79 |
| 35.0 | 1.82 | 1.42 | 1.23 | 1.79 |
| 35.5 | 1.79 | 1.47 | 1.46 | 1.87 |
| 36.0 | 1.51 | 1.46 | 1.33 | 1.92 |
| 36.5 | 1.78 | 1.33 | 1.28 | 1.91 |
| 37.0 | 1.71 | 1.36 | 1.35 | 1.83 |
| 37.5 | 1.70 | 1.23 | 1.38 | 1.93 |
| 38.0 | 1.73 | 1.35 | 1.28 | 1.86 |
| 38.5 | 1.80 | 1.42 | 1.27 | 2.00 |
| 39.0 | 1.80 | 1.46 | 1.35 | 2.01 |
| 39.5 | 1.80 | 1.38 | 1.34 | 1.87 |
| 40.0 | 1.72 | 1.42 | 1.33 | 1.86 |
| 40.5 | 1.64 | 1.33 | 1.19 | 1.84 |
| 41.0 | 1.75 | 1.38 | 1.29 | 1.91 |
| 41.5 | 1.74 | 1.49 | 1.22 | 1.84 |
| 42.0 | 1.68 | 1.46 | 1.46 | 1.78 |
| 42.5 | 1.81 | 1.36 | 1.31 | 1.88 |
| 43.0 | 1.77 | 1.44 | 1.20 | 1.88 |
| 43.5 | 1.77 | 1.33 | 1.29 | 1.98 |
| 44.0 | 1.79 | 1.39 | 1.40 | 1.96 |
| 44.5 | 1.69 | 1.43 | 1.24 | 1.87 |
| 45.0 | 1.86 | 1.19 | 1.36 | 1.91 |
| 45.5 | 1.69 | 1.26 | 1.29 | 1.84 |
| 46.0 | 1.83 | 1.27 | 1.25 | 1.90 |
| 46.5 | 1.76 | 1.39 | 1.14 | 1.89 |
| 47.0 | 1.78 | 1.30 | 1.12 | 1.81 |
| 47.5 | 1.61 | 1.42 | 1.43 | 1.84 |
| 48.0 | 1.70 | 1.38 | 1.32 | 1.87 |
| 48.5 | 1.80 | 1.33 | 1.13 | 1.87 |
| 49.0 | 1.57 | 1.37 | 1.28 | 1.98 |
| 49.5 | 1.77 | 1.50 | 1.30 | 1.89 |
| 50.0 | 1.76 | 1.41 | 1.19 | 1.90 |

**Table S19.**  $\lambda_{D-A}^i + \lambda_{D-A}^o(t_i)$ , in eV, for the DNA base pairs, using  $S_2 = \{\varepsilon_o = 1.8, \varepsilon_s = 80\}$ .

| $t_i$ (ns) | CG-GC | GC-A <sub>1</sub> T | A <sub>1</sub> T-A <sub>2</sub> T | A <sub>2</sub> T-TA |
|------------|-------|---------------------|-----------------------------------|---------------------|
| 10.0       | 2.21  | 1.95                | 1.62                              | 2.47                |
| 10.5       | 2.57  | 1.60                | 1.39                              | 2.49                |
| 11.0       | 2.39  | 1.90                | 1.59                              | 2.48                |
| 11.5       | 2.57  | 1.99                | 1.44                              | 2.53                |
| 12.0       | 2.67  | 1.70                | 1.60                              | 2.40                |
| 12.5       | 2.52  | 1.62                | 1.73                              | 2.44                |
| 13.0       | 2.52  | 1.52                | 1.64                              | 2.48                |
| 13.5       | 2.29  | 1.90                | 1.71                              | 2.60                |
| 14.0       | 2.63  | 1.75                | 1.73                              | 2.47                |
| 14.5       | 2.61  | 1.84                | 1.71                              | 2.46                |
| 15.0       | 2.56  | 1.75                | 1.59                              | 2.28                |
| 15.5       | 2.48  | 1.81                | 1.60                              | 2.64                |
| 16.0       | 2.36  | 1.63                | 1.72                              | 2.58                |
| 16.5       | 2.43  | 1.68                | 1.73                              | 2.47                |
| 17.0       | 2.56  | 1.49                | 1.84                              | 2.64                |
| 17.5       | 2.34  | 1.60                | 1.73                              | 2.50                |
| 18.0       | 2.46  | 1.55                | 1.59                              | 2.31                |
| 18.5       | 2.61  | 1.78                | 1.58                              | 2.64                |
| 19.0       | 2.54  | 1.77                | 1.78                              | 2.60                |
| 19.5       | 2.44  | 1.62                | 1.50                              | 2.59                |
| 20.0       | 2.64  | 1.86                | 1.53                              | 2.51                |
| 20.5       | 2.51  | 1.82                | 1.55                              | 2.43                |
| 21.0       | 2.57  | 1.79                | 1.64                              | 2.47                |
| 21.5       | 2.43  | 1.75                | 1.59                              | 2.47                |
| 22.0       | 2.55  | 1.90                | 1.56                              | 2.51                |
| 22.5       | 2.54  | 1.71                | 1.60                              | 2.53                |
| 23.0       | 2.51  | 1.54                | 1.79                              | 2.38                |
| 23.5       | 2.28  | 1.62                | 1.63                              | 2.51                |
| 24.0       | 2.40  | 1.77                | 1.68                              | 2.46                |
| 24.5       | 2.45  | 1.59                | 1.64                              | 2.60                |
| 25.0       | 2.31  | 1.76                | 1.72                              | 2.54                |
| 25.5       | 2.38  | 1.71                | 1.59                              | 2.53                |
| 26.0       | 2.47  | 1.79                | 1.67                              | 2.65                |
| 26.5       | 2.38  | 1.73                | 1.58                              | 2.52                |
| 27.0       | 2.59  | 1.71                | 1.67                              | 2.55                |
| 27.5       | 2.58  | 1.68                | 1.78                              | 2.48                |
| 28.0       | 2.41  | 1.73                | 1.51                              | 2.55                |
| 28.5       | 2.35  | 1.83                | 1.65                              | 2.45                |
| 29.0       | 2.54  | 1.71                | 1.73                              | 2.60                |
| 29.5       | 2.47  | 2.04                | 1.69                              | 2.52                |
| 30.0       | 2.55  | 1.86                | 1.70                              | 2.45                |
| 30.5       | 2.58  | 1.81                | 1.61                              | 2.60                |

|      |      |      |      |      |
|------|------|------|------|------|
| 31.0 | 2.31 | 1.99 | 1.84 | 2.54 |
| 31.5 | 2.54 | 1.77 | 1.60 | 2.43 |
| 32.0 | 2.52 | 1.93 | 1.62 | 2.44 |
| 32.5 | 2.55 | 1.75 | 1.52 | 2.58 |
| 33.0 | 2.48 | 1.83 | 1.79 | 2.58 |
| 33.5 | 2.66 | 1.61 | 1.82 | 2.56 |
| 34.0 | 2.14 | 1.64 | 1.59 | 2.52 |
| 34.5 | 2.44 | 1.62 | 1.76 | 2.60 |
| 35.0 | 2.61 | 1.89 | 1.80 | 2.46 |
| 35.5 | 2.39 | 1.83 | 1.60 | 2.53 |
| 36.0 | 2.46 | 1.92 | 1.70 | 2.56 |
| 36.5 | 2.42 | 1.63 | 1.50 | 2.45 |
| 37.0 | 2.49 | 1.90 | 1.85 | 2.36 |
| 37.5 | 2.57 | 1.68 | 1.64 | 2.58 |
| 38.0 | 2.57 | 1.88 | 1.56 | 2.46 |
| 38.5 | 2.63 | 1.60 | 1.63 | 2.43 |
| 39.0 | 2.43 | 1.76 | 1.97 | 2.52 |
| 39.5 | 2.55 | 1.74 | 1.80 | 2.44 |
| 40.0 | 2.49 | 1.75 | 1.92 | 2.53 |
| 40.5 | 2.47 | 1.94 | 1.60 | 2.54 |
| 41.0 | 2.45 | 1.53 | 1.62 | 2.50 |
| 41.5 | 2.60 | 1.70 | 1.67 | 2.37 |
| 42.0 | 2.46 | 1.69 | 1.75 | 2.37 |
| 42.5 | 2.47 | 1.65 | 1.79 | 2.50 |
| 43.0 | 2.52 | 1.81 | 1.47 | 2.56 |
| 43.5 | 2.47 | 1.69 | 1.68 | 2.60 |
| 44.0 | 2.60 | 1.71 | 1.67 | 2.69 |
| 44.5 | 2.63 | 1.59 | 1.64 | 2.51 |
| 45.0 | 2.36 | 1.70 | 1.76 | 2.63 |
| 45.5 | 2.53 | 1.81 | 1.76 | 2.52 |
| 46.0 | 2.32 | 1.79 | 1.99 | 2.60 |
| 46.5 | 2.39 | 1.85 | 1.87 | 2.67 |
| 47.0 | 2.35 | 1.67 | 1.80 | 2.59 |
| 47.5 | 2.40 | 1.92 | 1.67 | 2.53 |
| 48.0 | 2.32 | 1.91 | 1.64 | 2.59 |
| 48.5 | 2.55 | 1.65 | 1.91 | 2.55 |
| 49.0 | 2.39 | 1.74 | 1.64 | 2.51 |
| 49.5 | 2.43 | 1.87 | 1.65 | 2.63 |
| 50.0 | 2.53 | 1.79 | 1.91 | 2.59 |

**Table S20.**  $\lambda_{D-A}^i + \lambda_{D-A}^o(t_i)$ , in eV, for the 2'F-NA base pairs, using  $S_2 = \{\varepsilon_o = 1.8, \varepsilon_s = 80\}$ .

| $t_i$ (ns) | CG-GC | GC-A <sub>1</sub> T | A <sub>1</sub> T-A <sub>2</sub> T | A <sub>2</sub> T-TA |
|------------|-------|---------------------|-----------------------------------|---------------------|
| 10.0       | 2.53  | 1.65                | 1.53                              | 2.46                |
| 10.5       | 2.07  | 1.88                | 1.98                              | 2.66                |
| 11.0       | 2.30  | 1.68                | 1.54                              | 2.54                |
| 11.5       | 2.22  | 1.99                | 1.83                              | 2.72                |
| 12.0       | 2.35  | 1.88                | 1.45                              | 2.67                |
| 12.5       | 2.42  | 1.90                | 1.78                              | 2.65                |
| 13.0       | 2.39  | 2.03                | 1.67                              | 2.40                |
| 13.5       | 2.01  | 1.92                | 1.90                              | 2.52                |
| 14.0       | 1.80  | 2.00                | 1.77                              | 2.51                |
| 14.5       | 2.11  | 1.82                | 1.58                              | 2.49                |
| 15.0       | 2.35  | 1.67                | 1.72                              | 2.59                |
| 15.5       | 2.28  | 2.08                | 1.85                              | 2.58                |
| 16.0       | 2.28  | 1.84                | 1.81                              | 2.65                |
| 16.5       | 2.37  | 1.99                | 1.82                              | 2.56                |
| 17.0       | 2.30  | 1.50                | 1.73                              | 2.78                |
| 17.5       | 2.32  | 1.84                | 1.68                              | 2.45                |
| 18.0       | 2.05  | 1.87                | 1.74                              | 2.53                |
| 18.5       | 2.11  | 1.82                | 1.58                              | 2.49                |
| 19.0       | 2.20  | 1.73                | 1.87                              | 2.65                |
| 19.5       | 2.23  | 1.82                | 1.84                              | 2.70                |
| 20.0       | 2.42  | 1.73                | 1.68                              | 2.65                |
| 20.5       | 2.06  | 1.88                | 1.77                              | 2.69                |
| 21.0       | 2.25  | 2.10                | 2.16                              | 2.71                |
| 21.5       | 2.39  | 1.84                | 1.90                              | 2.79                |
| 22.0       | 2.29  | 1.80                | 1.64                              | 2.68                |
| 22.5       | 2.26  | 1.99                | 1.81                              | 2.70                |
| 23.0       | 2.22  | 1.77                | 1.69                              | 2.54                |
| 23.5       | 2.39  | 1.75                | 1.54                              | 2.51                |
| 24.0       | 2.21  | 1.68                | 1.65                              | 2.50                |
| 24.5       | 2.34  | 1.88                | 1.76                              | 2.63                |
| 25.0       | 2.28  | 1.93                | 1.79                              | 2.53                |
| 25.5       | 2.14  | 2.01                | 1.67                              | 2.68                |
| 26.0       | 2.37  | 1.70                | 1.73                              | 2.57                |
| 26.5       | 2.22  | 1.90                | 1.80                              | 2.71                |
| 27.0       | 2.33  | 1.93                | 1.79                              | 2.79                |
| 27.5       | 2.28  | 1.84                | 1.63                              | 2.81                |
| 28.0       | 2.38  | 1.56                | 1.90                              | 2.54                |
| 28.5       | 2.23  | 1.80                | 1.78                              | 2.38                |
| 29.0       | 2.32  | 1.86                | 1.66                              | 2.78                |
| 29.5       | 2.27  | 1.77                | 1.81                              | 2.62                |
| 30.0       | 2.36  | 1.82                | 1.66                              | 2.61                |
| 30.5       | 2.37  | 1.87                | 1.77                              | 2.65                |

|      |      |      |      |      |
|------|------|------|------|------|
| 31.0 | 2.06 | 1.92 | 1.70 | 2.62 |
| 31.5 | 2.15 | 1.65 | 1.63 | 2.52 |
| 32.0 | 2.23 | 1.81 | 1.73 | 2.60 |
| 32.5 | 2.27 | 1.60 | 1.65 | 2.70 |
| 33.0 | 2.25 | 1.93 | 1.63 | 2.58 |
| 33.5 | 2.31 | 1.84 | 1.87 | 2.61 |
| 34.0 | 2.43 | 1.73 | 1.60 | 2.62 |
| 34.5 | 2.48 | 1.66 | 1.61 | 2.49 |
| 35.0 | 2.44 | 1.89 | 1.64 | 2.49 |
| 35.5 | 2.39 | 1.95 | 1.99 | 2.60 |
| 36.0 | 1.97 | 1.94 | 1.80 | 2.69 |
| 36.5 | 2.37 | 1.74 | 1.72 | 2.67 |
| 37.0 | 2.26 | 1.80 | 1.82 | 2.55 |
| 37.5 | 2.25 | 1.59 | 1.86 | 2.70 |
| 38.0 | 2.29 | 1.77 | 1.72 | 2.59 |
| 38.5 | 2.40 | 1.87 | 1.71 | 2.81 |
| 39.0 | 2.41 | 1.94 | 1.83 | 2.82 |
| 39.5 | 2.41 | 1.81 | 1.81 | 2.61 |
| 40.0 | 2.28 | 1.87 | 1.80 | 2.60 |
| 40.5 | 2.16 | 1.75 | 1.58 | 2.57 |
| 41.0 | 2.33 | 1.82 | 1.74 | 2.67 |
| 41.5 | 2.31 | 1.98 | 1.62 | 2.56 |
| 42.0 | 2.22 | 1.94 | 2.00 | 2.48 |
| 42.5 | 2.42 | 1.79 | 1.77 | 2.62 |
| 43.0 | 2.36 | 1.90 | 1.60 | 2.62 |
| 43.5 | 2.36 | 1.75 | 1.74 | 2.78 |
| 44.0 | 2.38 | 1.83 | 1.90 | 2.75 |
| 44.5 | 2.23 | 1.89 | 1.66 | 2.61 |
| 45.0 | 2.50 | 1.53 | 1.85 | 2.67 |
| 45.5 | 2.24 | 1.63 | 1.73 | 2.56 |
| 46.0 | 2.45 | 1.65 | 1.68 | 2.65 |
| 46.5 | 2.35 | 1.83 | 1.50 | 2.64 |
| 47.0 | 2.37 | 1.70 | 1.48 | 2.52 |
| 47.5 | 2.11 | 1.88 | 1.94 | 2.56 |
| 48.0 | 2.25 | 1.82 | 1.78 | 2.62 |
| 48.5 | 2.41 | 1.75 | 1.50 | 2.60 |
| 49.0 | 2.06 | 1.81 | 1.72 | 2.77 |
| 49.5 | 2.35 | 2.00 | 1.76 | 2.64 |
| 50.0 | 2.34 | 1.87 | 1.58 | 2.66 |

**Table S21.**  $\lambda_{D-A}^i + \lambda_{D-A}^o(t_i)$ , in eV, for the DNA base pairs, using  $S_3 = \{\varepsilon_o = 2, \varepsilon_s = 8\}$ .

| $t_i$ (ns) | CG-GC | GC-A <sub>1</sub> T | A <sub>1</sub> T-A <sub>2</sub> T | A <sub>2</sub> T-TA |
|------------|-------|---------------------|-----------------------------------|---------------------|
| 10.0       | 1.72  | 1.50                | 1.24                              | 1.83                |
| 10.5       | 1.97  | 1.26                | 1.09                              | 1.84                |
| 11.0       | 1.84  | 1.47                | 1.22                              | 1.84                |
| 11.5       | 1.97  | 1.53                | 1.12                              | 1.88                |
| 12.0       | 2.03  | 1.33                | 1.24                              | 1.78                |
| 12.5       | 1.93  | 1.28                | 1.32                              | 1.81                |
| 13.0       | 1.93  | 1.21                | 1.26                              | 1.84                |
| 13.5       | 1.77  | 1.47                | 1.31                              | 1.92                |
| 14.0       | 2.01  | 1.37                | 1.32                              | 1.84                |
| 14.5       | 2.00  | 1.43                | 1.31                              | 1.83                |
| 15.0       | 1.96  | 1.36                | 1.23                              | 1.71                |
| 15.5       | 1.91  | 1.41                | 1.24                              | 1.95                |
| 16.0       | 1.82  | 1.28                | 1.31                              | 1.91                |
| 16.5       | 1.87  | 1.32                | 1.32                              | 1.84                |
| 17.0       | 1.96  | 1.19                | 1.40                              | 1.95                |
| 17.5       | 1.81  | 1.27                | 1.32                              | 1.86                |
| 18.0       | 1.89  | 1.23                | 1.22                              | 1.72                |
| 18.5       | 1.99  | 1.39                | 1.22                              | 1.95                |
| 19.0       | 1.95  | 1.38                | 1.36                              | 1.92                |
| 19.5       | 1.88  | 1.28                | 1.16                              | 1.92                |
| 20.0       | 2.02  | 1.44                | 1.18                              | 1.86                |
| 20.5       | 1.92  | 1.42                | 1.20                              | 1.81                |
| 21.0       | 1.97  | 1.39                | 1.26                              | 1.84                |
| 21.5       | 1.87  | 1.37                | 1.23                              | 1.84                |
| 22.0       | 1.95  | 1.47                | 1.21                              | 1.86                |
| 22.5       | 1.95  | 1.34                | 1.23                              | 1.88                |
| 23.0       | 1.93  | 1.23                | 1.37                              | 1.77                |
| 23.5       | 1.76  | 1.28                | 1.25                              | 1.86                |
| 24.0       | 1.85  | 1.38                | 1.29                              | 1.83                |
| 24.5       | 1.88  | 1.25                | 1.26                              | 1.93                |
| 25.0       | 1.79  | 1.38                | 1.31                              | 1.89                |
| 25.5       | 1.84  | 1.34                | 1.22                              | 1.87                |
| 26.0       | 1.90  | 1.39                | 1.28                              | 1.96                |
| 26.5       | 1.84  | 1.35                | 1.22                              | 1.87                |
| 27.0       | 1.98  | 1.34                | 1.28                              | 1.89                |
| 27.5       | 1.97  | 1.32                | 1.36                              | 1.84                |
| 28.0       | 1.86  | 1.35                | 1.17                              | 1.89                |
| 28.5       | 1.81  | 1.43                | 1.27                              | 1.82                |
| 29.0       | 1.94  | 1.34                | 1.32                              | 1.93                |
| 29.5       | 1.90  | 1.57                | 1.30                              | 1.87                |
| 30.0       | 1.95  | 1.44                | 1.30                              | 1.82                |
| 30.5       | 1.97  | 1.41                | 1.24                              | 1.92                |

|      |      |      |      |      |
|------|------|------|------|------|
| 31.0 | 1.79 | 1.53 | 1.40 | 1.88 |
| 31.5 | 1.95 | 1.38 | 1.23 | 1.81 |
| 32.0 | 1.93 | 1.49 | 1.24 | 1.82 |
| 32.5 | 1.95 | 1.37 | 1.18 | 1.91 |
| 33.0 | 1.90 | 1.43 | 1.37 | 1.91 |
| 33.5 | 2.03 | 1.27 | 1.39 | 1.90 |
| 34.0 | 1.67 | 1.30 | 1.23 | 1.87 |
| 34.5 | 1.88 | 1.28 | 1.35 | 1.93 |
| 35.0 | 2.00 | 1.47 | 1.37 | 1.83 |
| 35.5 | 1.84 | 1.42 | 1.23 | 1.87 |
| 36.0 | 1.89 | 1.48 | 1.30 | 1.90 |
| 36.5 | 1.86 | 1.28 | 1.17 | 1.82 |
| 37.0 | 1.91 | 1.47 | 1.41 | 1.76 |
| 37.5 | 1.97 | 1.32 | 1.26 | 1.91 |
| 38.0 | 1.97 | 1.46 | 1.20 | 1.83 |
| 38.5 | 2.01 | 1.27 | 1.25 | 1.81 |
| 39.0 | 1.87 | 1.38 | 1.49 | 1.87 |
| 39.5 | 1.95 | 1.36 | 1.37 | 1.81 |
| 40.0 | 1.91 | 1.37 | 1.45 | 1.88 |
| 40.5 | 1.90 | 1.50 | 1.23 | 1.88 |
| 41.0 | 1.88 | 1.22 | 1.25 | 1.85 |
| 41.5 | 1.99 | 1.33 | 1.28 | 1.76 |
| 42.0 | 1.89 | 1.32 | 1.34 | 1.76 |
| 42.5 | 1.90 | 1.30 | 1.36 | 1.85 |
| 43.0 | 1.93 | 1.41 | 1.14 | 1.90 |
| 43.5 | 1.90 | 1.33 | 1.29 | 1.93 |
| 44.0 | 1.99 | 1.34 | 1.28 | 1.98 |
| 44.5 | 2.00 | 1.25 | 1.26 | 1.86 |
| 45.0 | 1.82 | 1.33 | 1.34 | 1.94 |
| 45.5 | 1.94 | 1.41 | 1.34 | 1.87 |
| 46.0 | 1.80 | 1.39 | 1.50 | 1.92 |
| 46.5 | 1.84 | 1.43 | 1.42 | 1.97 |
| 47.0 | 1.81 | 1.31 | 1.37 | 1.92 |
| 47.5 | 1.85 | 1.49 | 1.28 | 1.87 |
| 48.0 | 1.79 | 1.48 | 1.26 | 1.92 |
| 48.5 | 1.96 | 1.30 | 1.45 | 1.89 |
| 49.0 | 1.84 | 1.36 | 1.26 | 1.86 |
| 49.5 | 1.87 | 1.45 | 1.27 | 1.94 |
| 50.0 | 1.94 | 1.39 | 1.45 | 1.92 |

**Table S22.**  $\lambda_{D-A}^i + \lambda_{D-A}^o(t_i)$ , in eV, for the 2'F-NA base pairs, using  $S_3 = \{\varepsilon_o = 2, \varepsilon_s = 8\}$ .

| $t_i$ (ns) | CG-GC | GC-A <sub>1</sub> T | A <sub>1</sub> T-A <sub>2</sub> T | A <sub>2</sub> T-TA |
|------------|-------|---------------------|-----------------------------------|---------------------|
| 10.0       | 1.94  | 1.30                | 1.18                              | 1.82                |
| 10.5       | 1.62  | 1.46                | 1.49                              | 1.97                |
| 11.0       | 1.78  | 1.32                | 1.19                              | 1.88                |
| 11.5       | 1.72  | 1.53                | 1.39                              | 2.00                |
| 12.0       | 1.82  | 1.46                | 1.13                              | 1.97                |
| 12.5       | 1.87  | 1.47                | 1.36                              | 1.96                |
| 13.0       | 1.84  | 1.56                | 1.28                              | 1.78                |
| 13.5       | 1.58  | 1.49                | 1.44                              | 1.87                |
| 14.0       | 1.44  | 1.54                | 1.35                              | 1.86                |
| 14.5       | 1.65  | 1.41                | 1.22                              | 1.85                |
| 15.0       | 1.81  | 1.32                | 1.31                              | 1.92                |
| 15.5       | 1.77  | 1.60                | 1.41                              | 1.91                |
| 16.0       | 1.77  | 1.43                | 1.38                              | 1.96                |
| 16.5       | 1.83  | 1.54                | 1.38                              | 1.89                |
| 17.0       | 1.78  | 1.20                | 1.32                              | 2.05                |
| 17.5       | 1.79  | 1.43                | 1.29                              | 1.82                |
| 18.0       | 1.60  | 1.45                | 1.33                              | 1.88                |
| 18.5       | 1.65  | 1.41                | 1.22                              | 1.85                |
| 19.0       | 1.71  | 1.35                | 1.42                              | 1.96                |
| 19.5       | 1.73  | 1.42                | 1.40                              | 2.00                |
| 20.0       | 1.86  | 1.35                | 1.29                              | 1.96                |
| 20.5       | 1.61  | 1.46                | 1.35                              | 1.99                |
| 21.0       | 1.74  | 1.61                | 1.62                              | 2.00                |
| 21.5       | 1.84  | 1.43                | 1.44                              | 2.05                |
| 22.0       | 1.77  | 1.40                | 1.26                              | 1.98                |
| 22.5       | 1.75  | 1.53                | 1.38                              | 1.99                |
| 23.0       | 1.72  | 1.38                | 1.30                              | 1.88                |
| 23.5       | 1.84  | 1.37                | 1.19                              | 1.86                |
| 24.0       | 1.72  | 1.32                | 1.27                              | 1.86                |
| 24.5       | 1.81  | 1.46                | 1.34                              | 1.94                |
| 25.0       | 1.77  | 1.49                | 1.36                              | 1.88                |
| 25.5       | 1.67  | 1.55                | 1.28                              | 1.98                |
| 26.0       | 1.83  | 1.33                | 1.32                              | 1.90                |
| 26.5       | 1.73  | 1.47                | 1.37                              | 2.00                |
| 27.0       | 1.80  | 1.49                | 1.37                              | 2.06                |
| 27.5       | 1.77  | 1.43                | 1.25                              | 2.07                |
| 28.0       | 1.84  | 1.24                | 1.44                              | 1.88                |
| 28.5       | 1.73  | 1.40                | 1.36                              | 1.77                |
| 29.0       | 1.79  | 1.44                | 1.28                              | 2.05                |
| 29.5       | 1.76  | 1.38                | 1.38                              | 1.94                |
| 30.0       | 1.82  | 1.42                | 1.27                              | 1.93                |
| 30.5       | 1.83  | 1.45                | 1.35                              | 1.96                |



|      |      |      |      |      |
|------|------|------|------|------|
| 31.0 | 1.61 | 1.48 | 1.30 | 1.93 |
| 31.5 | 1.67 | 1.30 | 1.25 | 1.87 |
| 32.0 | 1.73 | 1.41 | 1.32 | 1.92 |
| 32.5 | 1.76 | 1.27 | 1.27 | 1.99 |
| 33.0 | 1.74 | 1.49 | 1.26 | 1.91 |
| 33.5 | 1.79 | 1.43 | 1.42 | 1.93 |
| 34.0 | 1.87 | 1.35 | 1.23 | 1.94 |
| 34.5 | 1.90 | 1.31 | 1.24 | 1.85 |
| 35.0 | 1.87 | 1.46 | 1.26 | 1.85 |
| 35.5 | 1.84 | 1.51 | 1.50 | 1.93 |
| 36.0 | 1.55 | 1.50 | 1.37 | 1.99 |
| 36.5 | 1.83 | 1.36 | 1.32 | 1.97 |
| 37.0 | 1.75 | 1.40 | 1.39 | 1.89 |
| 37.5 | 1.74 | 1.26 | 1.42 | 2.00 |
| 38.0 | 1.77 | 1.38 | 1.32 | 1.92 |
| 38.5 | 1.85 | 1.45 | 1.31 | 2.07 |
| 39.0 | 1.85 | 1.50 | 1.39 | 2.08 |
| 39.5 | 1.85 | 1.41 | 1.38 | 1.93 |
| 40.0 | 1.77 | 1.45 | 1.37 | 1.92 |
| 40.5 | 1.68 | 1.37 | 1.22 | 1.90 |
| 41.0 | 1.80 | 1.42 | 1.33 | 1.97 |
| 41.5 | 1.79 | 1.53 | 1.25 | 1.90 |
| 42.0 | 1.72 | 1.50 | 1.51 | 1.84 |
| 42.5 | 1.86 | 1.39 | 1.35 | 1.94 |
| 43.0 | 1.82 | 1.47 | 1.24 | 1.94 |
| 43.5 | 1.82 | 1.37 | 1.33 | 2.05 |
| 44.0 | 1.84 | 1.42 | 1.44 | 2.03 |
| 44.5 | 1.73 | 1.47 | 1.27 | 1.93 |
| 45.0 | 1.91 | 1.21 | 1.40 | 1.97 |
| 45.5 | 1.74 | 1.29 | 1.32 | 1.90 |
| 46.0 | 1.88 | 1.30 | 1.29 | 1.96 |
| 46.5 | 1.81 | 1.42 | 1.17 | 1.95 |
| 47.0 | 1.83 | 1.33 | 1.15 | 1.87 |
| 47.5 | 1.65 | 1.46 | 1.47 | 1.90 |
| 48.0 | 1.74 | 1.41 | 1.36 | 1.93 |
| 48.5 | 1.85 | 1.37 | 1.16 | 1.93 |
| 49.0 | 1.61 | 1.41 | 1.32 | 2.04 |
| 49.5 | 1.82 | 1.54 | 1.34 | 1.95 |
| 50.0 | 1.81 | 1.45 | 1.22 | 1.97 |

**Table S23.**  $\lambda_{D-A}^o \equiv \langle \lambda_{D-A}^o(t) \rangle$  (see eq 4), in eV, for the indicated systems and choices of dielectric constants.

| base pair                         | DNA   |       |       | 2'F-ANA |       |       |
|-----------------------------------|-------|-------|-------|---------|-------|-------|
|                                   | $S_1$ | $S_2$ | $S_3$ | $S_1$   | $S_2$ | $S_3$ |
| CG-GC                             | 1.23  | 1.86  | 1.28  | 1.10    | 1.66  | 1.15  |
| GC-A <sub>1</sub> T               | 0.82  | 1.23  | 0.85  | 0.87    | 1.31  | 0.90  |
| A <sub>1</sub> T-A <sub>2</sub> T | 0.84  | 1.26  | 0.87  | 0.88    | 1.32  | 0.91  |
| A <sub>2</sub> T-TA               | 1.39  | 2.10  | 1.45  | 1.46    | 2.20  | 1.52  |

## REFERENCES

1. A. Migliore, *J. Chem. Phys.*, 2009, **131**, 114113.
2. R. D. Teo, K. Terai, A. Migliore and D. N. Beratan, *Phys. Chem. Chem. Phys.*, 2018, **20**, 26063-26067.
